# Supplementary material for: An update on the impact of pre-transplant transfusions and allosensitization on time to renal transplant and on allograft survival
Source: PubMed Central journal article supplement (PMC4125965; doi:10.1186/1471-2369-14-217), 2013-10-10
Supplement: 1471-2369-14-217-S1.pdf [file 1471-2369-14-217-S1.pdf]

**Example of Embase® and MEDLINE® search strategy for question 1 (Association of pre-transplant transfusions with allosensitization)**

|     | <b>Search term</b>                                                                                                                 | <b>Results</b> |
|-----|------------------------------------------------------------------------------------------------------------------------------------|----------------|
| #1  | 'kidney'/de                                                                                                                        | 231 545        |
| #2  | 'kidney transplantation'/exp                                                                                                       | 88 397         |
| #3  | renal:ab,ti                                                                                                                        | 461 262        |
| #4  | kidney:ab,ti                                                                                                                       | 278 367        |
| #5  | OR/1-4                                                                                                                             | 738 570        |
| #6  | 'HLA system'/exp                                                                                                                   | 16 791         |
| #7  | 'HLA typing'/exp                                                                                                                   | 12 400         |
| #8  | ('hla-dr' AND (mismatch* OR match*)):ab,ti                                                                                         | 1390           |
| #9  | (hla NEAR/1 (matching OR typing)):ab,ti                                                                                            | 4442           |
| #10 | 'antibody'/de                                                                                                                      | 100 059        |
| #11 | antibod*:ab,ti                                                                                                                     | 684 329        |
| #12 | 'alloantibody'/de                                                                                                                  | 6362           |
| #13 | alloantibod*:ab,ti                                                                                                                 | 3346           |
| #14 | 'allosensiti?ation':ab,ti                                                                                                          | 252            |
| #15 | sensiti?ation:ab,ti                                                                                                                | 63 265         |
| #16 | sensiti?ed:ab,ti                                                                                                                   | 36 389         |
| #17 | ('flow beads' OR Luminex OR 'flow PRA' OR 'single antigen testing'):ab,ti                                                          | 1768           |
| #18 | 'histocompatibility'/de                                                                                                            | 17 250         |
| #19 | 'histoincompatibility'/de                                                                                                          | 420            |
| #20 | Isoantibod*:ab,ti                                                                                                                  | 371            |
| #21 | OR/6-20                                                                                                                            | 829 811        |
| #22 | 'blood transfusion'/de                                                                                                             | 73 042         |
| #23 | 'blood component therapy'/de                                                                                                       | 1830           |
| #24 | 'erythrocyte transfusion'/de                                                                                                       | 9356           |
| #25 | ((blood OR 'red blood cells' OR erythrocyte*) NEAR/1 (transfusion* OR exchange OR infusion OR replacement OR retransfusion)):ab,ti | 34 382         |
| #26 | (donor NEAR/2 transfusion*):ab,ti                                                                                                  | 1049           |
| #27 | (hemotherapy OR haemotherapy):ab,ti                                                                                                | 660            |
| #28 | 'transfusion therapy':ab,ti                                                                                                        | 1928           |
| #29 | (pretransplant* AND transfusion*):ab,ti                                                                                            | 686            |
| #30 | OR/22-29                                                                                                                           | 94 629         |
| #31 | #5 AND #21 AND #30                                                                                                                 | 1593           |
